# Supplementary material
Source: publisher site journal article supplement (https://www.dovepress.com/article/365302)
Supplement: Supplementary file 1 [file get_supplementary_file.php]

**Supplementary Table 1** Univariate and multivariate analyses of factors associated with overall survival.

| **Variable** | **Univariate** | **Multivariate** | | |
| --- | --- | --- | --- | --- |
| p | HR | 95%CI | p |
| Age，year (≥50 vs.＜50) | 0.074 | - | - | - |
| Gender (Male vs. Female) | 0.735 | - | - | -- |
| HBs antigen (Positive vs. Negative) | 0.913 | - | - | - |
| Liver cirrhosis (Yes vs. No) | 0.534 | - | - | - |
| AFP (>20 vs. ≤20) | 0.071 | - | -- | - |
| Grade (III-IV vs. I-II) | 0.274 | - | - | - |
| Tumor size (>5 vs. ≤5) | **0.010** | - | - | 0.095 |
| Encapsulation complete (Yes vs. No) | **0.020** | - | - | 0.123 |
| Vascular invasion (Yes vs. No) | **0.010** | - | - | 0.202 |
| TNM stage (III-IV vs. I-II) | **0.003** | 2.314 | 1.147-4.668 | **0.019** |
| CTB-193M12.5 (High vs. Low) | **0.006** | 1.924 | 1.024-3.615 | **0.042** |

Abbreviations: HBs antigen, hepatitis B surface antigen; 95% CI, 95% confidence interval; HR, hazard ratio. p values were acquired using Cox regression analyses. Bold texts indicate significant factors after univariate or multivariate analyses.
